# Supplementary material
Source: publisher figshare collection journal article supplement (https://gsajournals.figshare.com/ndownloader/files/12231422)
Supplement: Supplementary file 1 [file 12231422]

**Table S5. The injection mixes of the CRISPR/Cas9 system.**

| **Injection mix for cs-CRISPR-mediated DNA insertions** | |
| --- | --- |
| Plasmids | Concentration (ng/µl) |
| pDD162 | 50 |
| sgRNA(F+E) #1 | 35 |
| sgRNA(F+E) #2 | 35 |
| sgRNA(F+E) #3 | 35 |
| pSG261 | 15 |
| pSG259 | 3 |
| **Injection mix for multiple-sgRNAs-mediated chromosomal inversions** | |
| Plasmids | Concentration (ng/µl) |
| Cas9 expression vector  (Addgene plasmid #46168) | 50 |
| sgRNA #1 | 50 |
| sgRNA #2 | 50 |
| sgRNA #3 | 50 |
| pCFJ90 | 5 |
